# Supplementary material for: Interplay between RNA interference and heat shock response systems in Drosophila melanogaster
Source: PubMed Central journal article supplement (PMC5090062; doi:10.1098/rsob.160224), 2016-10-19

A

Biological processes of unique group #1 ( $w^{1118}$  vs  $hsp70^-$ ) miRNA targets

(1)

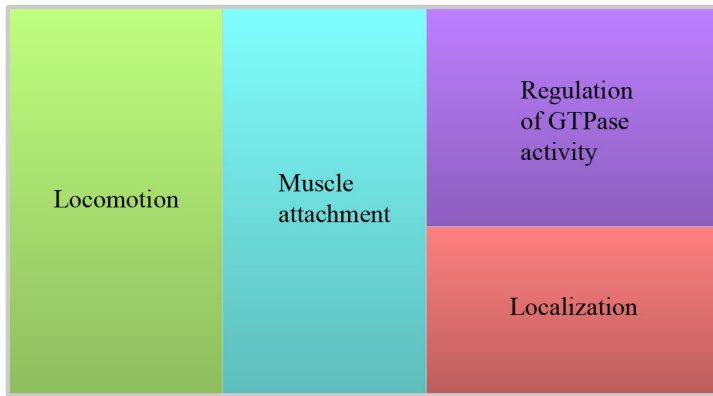

(2)

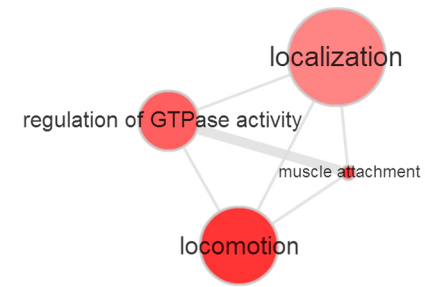

B

Biological processes of unique group #2 ( $w^{1118}$  vs  $yw$ ) miRNA targets

(1)

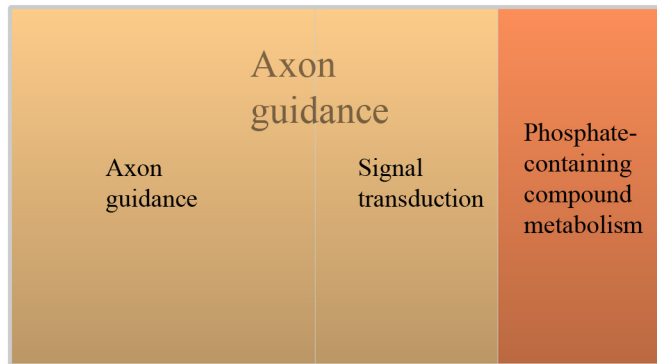

(2)

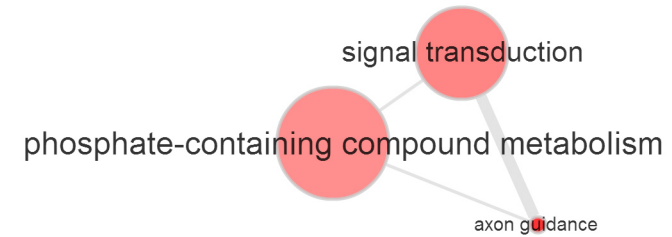

C

Biological processes of unique group #3 ( $hsp70^-$  vs  $yw$ ) miRNA targets

(1)

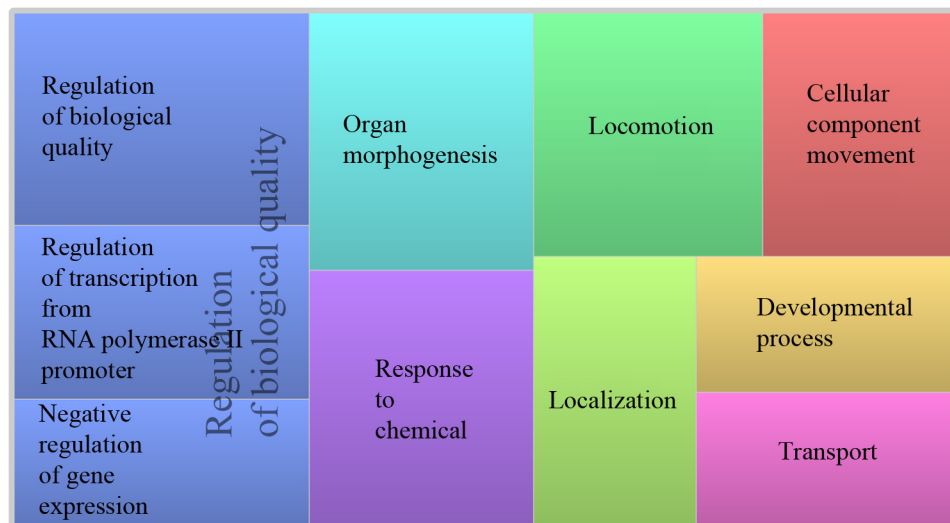

(2)

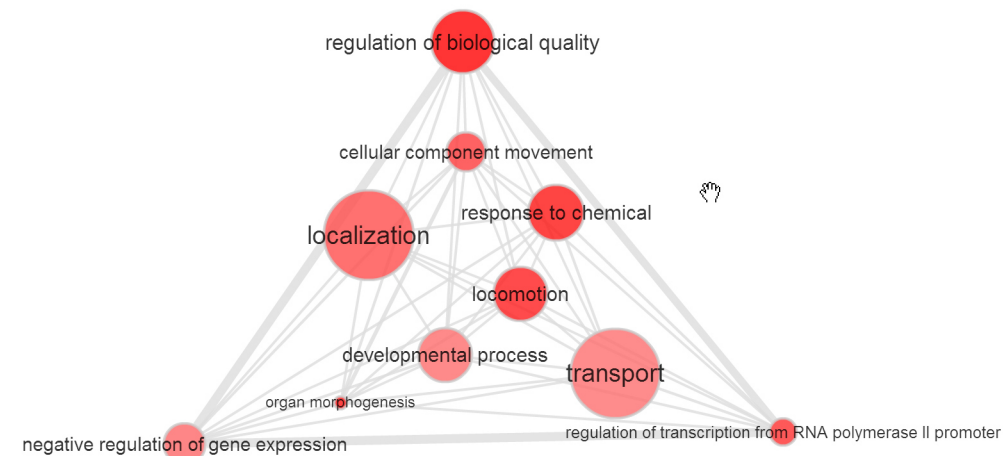

**D**Biological processes of shared group #1 ( $w^{1118}$  vs  $hsp70^-$  &  $w^{1118}$  vs  $yw$ ) miRNA targets

(1)

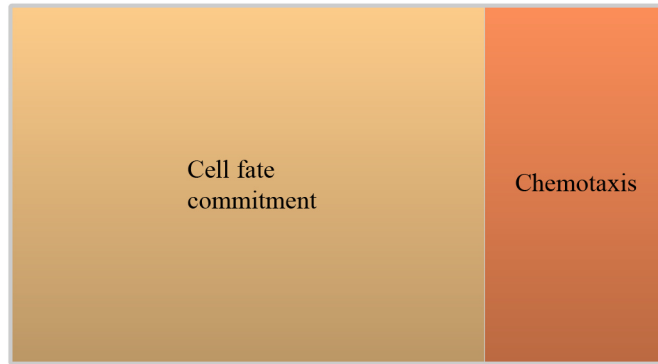

(2)

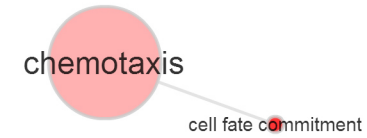**E**Biological processes of shared group #2 ( $w^{1118}$  vs  $yw$  &  $hsp70^-$  vs  $yw$ ) miRNA targets

(1)

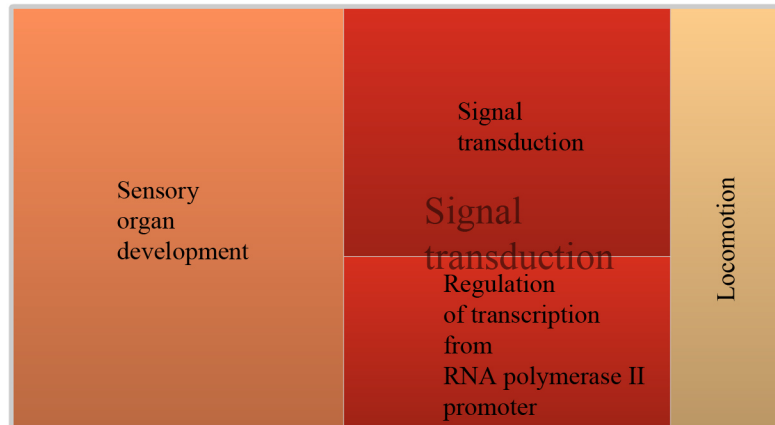

(2)

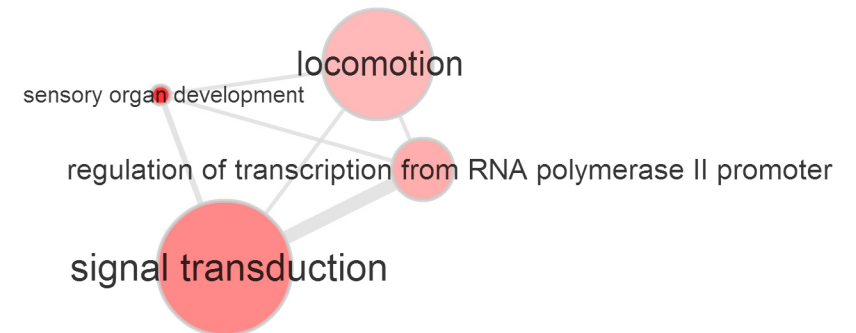**F**Biological processes of shared group #3 ( $w^{1118}$  vs  $hsp70^-$  &  $hsp70^-$  vs  $yw$ ) miRNA targets

(1)

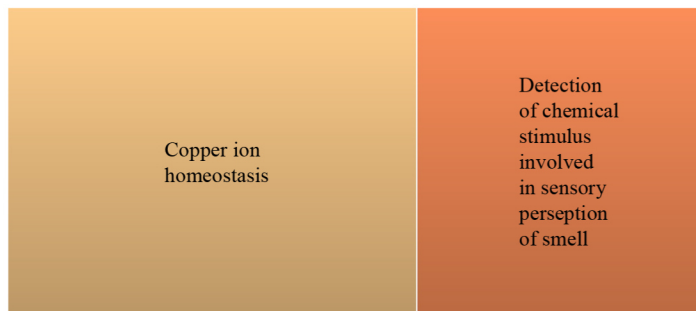

(2)

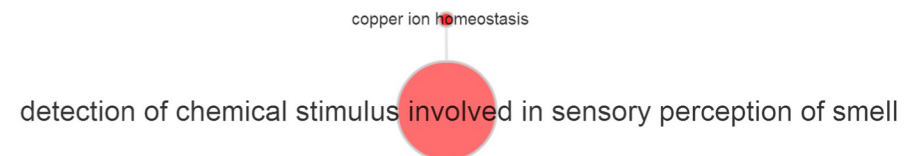

G

## Biological processes of common miRNA targets

(1)

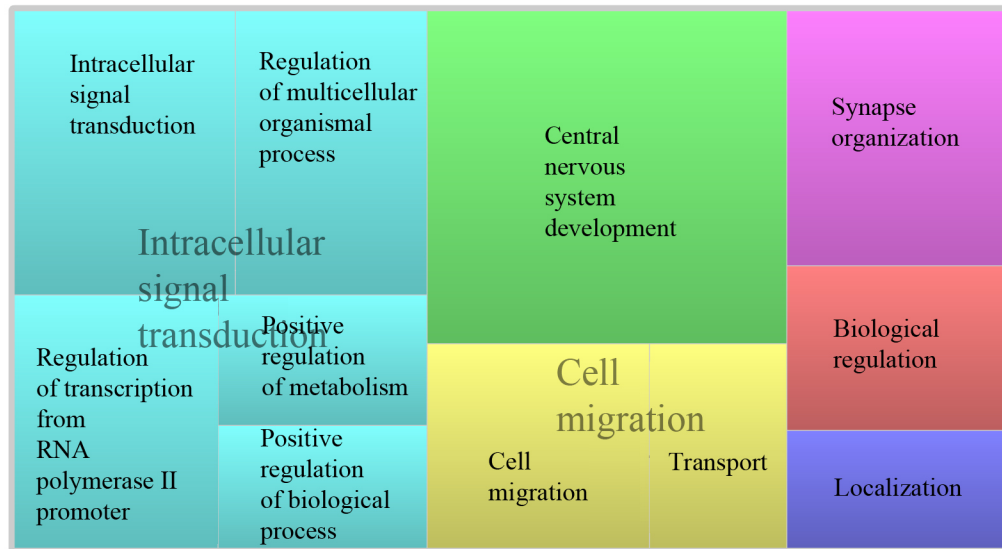

(2)

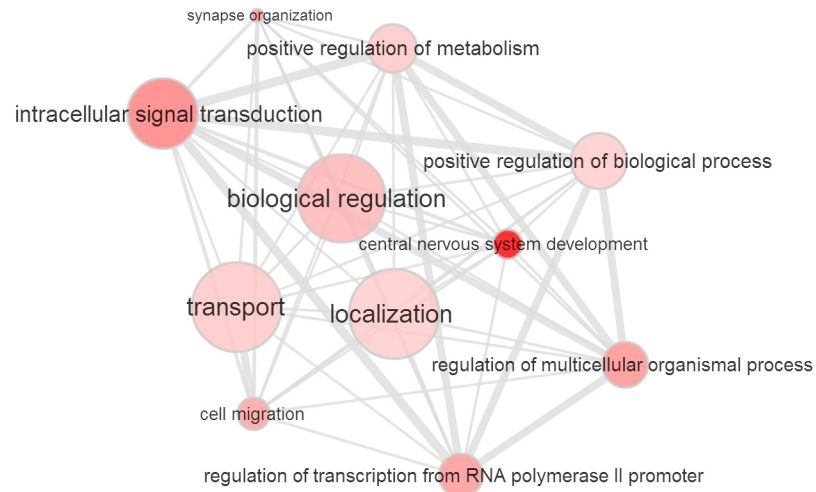

Supplement: rsob160224supp3.pdf [file rsob160224supp3.pdf]
