# Supplementary material for: Interplay between RNA interference and heat shock response systems in Drosophila melanogaster
Source: PubMed Central journal article supplement (PMC5090062; doi:10.1098/rsob.160224), 2016-10-19

A

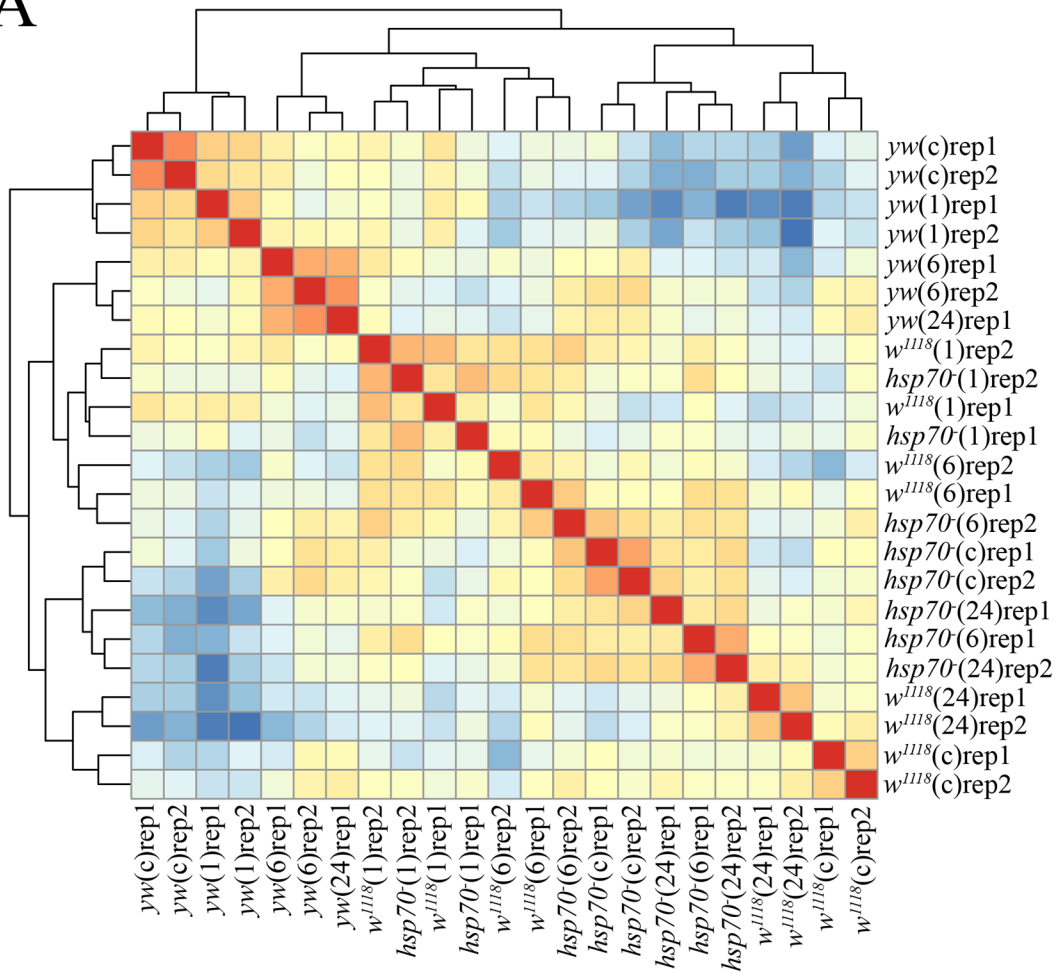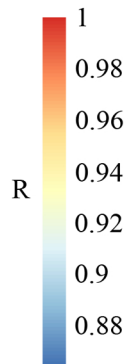

B

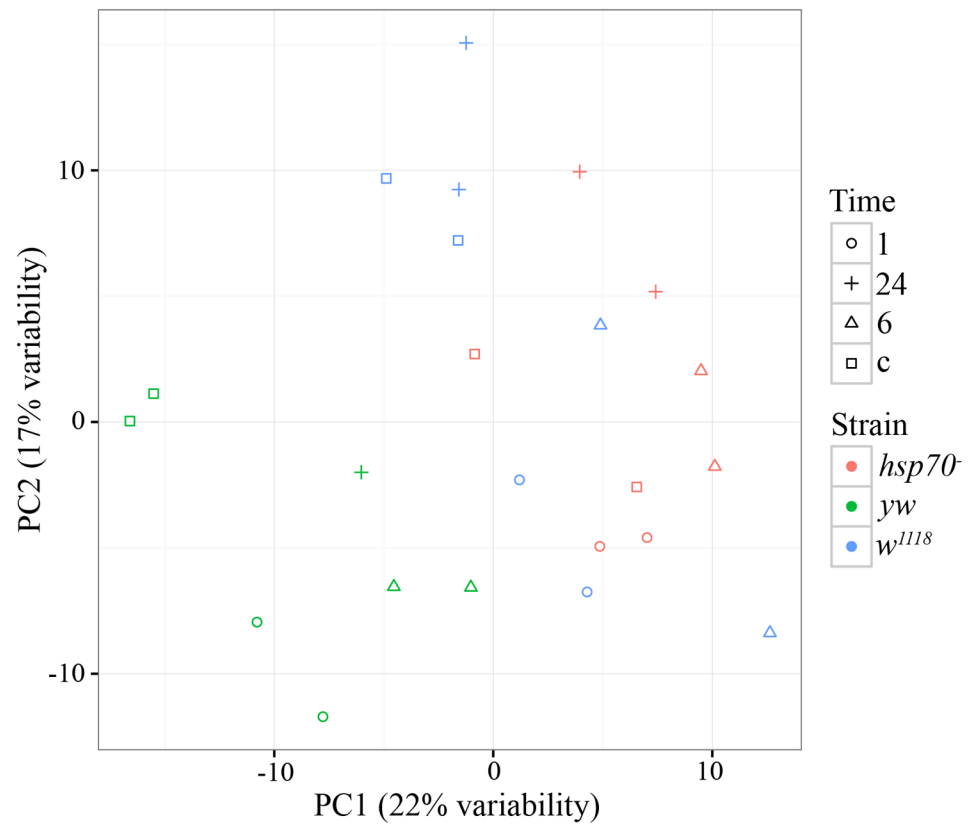

Supplement: rsob160224supp1.pdf [file rsob160224supp1.pdf]
