# Supplementary material for: Interplay between RNA interference and heat shock response systems in Drosophila melanogaster
Source: PubMed Central journal article supplement (PMC5090062; doi:10.1098/rsob.160224), 2016-10-19

A

Dynamics of miRNA expression ( $w^{1118}$  vs  $hsp70^-$ )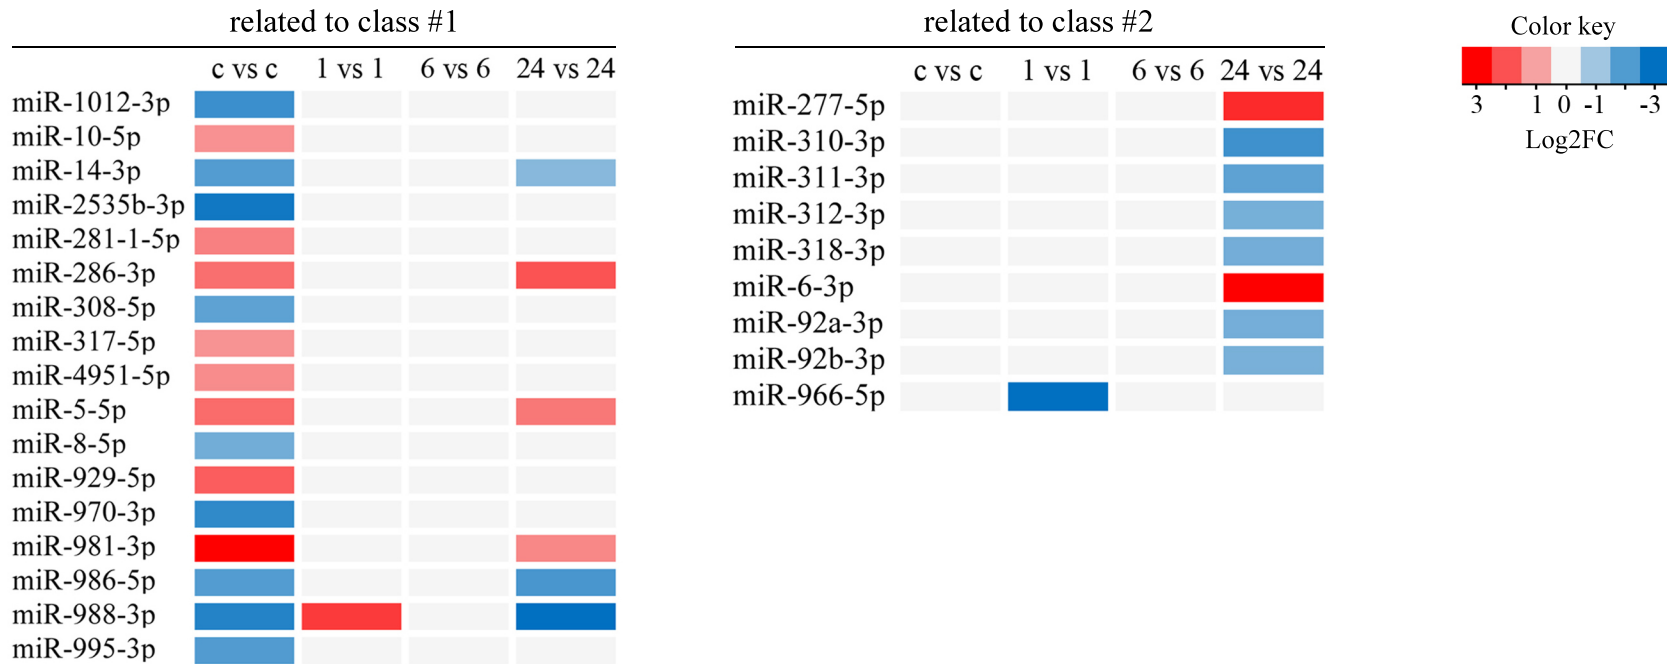

**B**Dynamics of miRNA expression (*w<sup>1118</sup>* vs *yw*)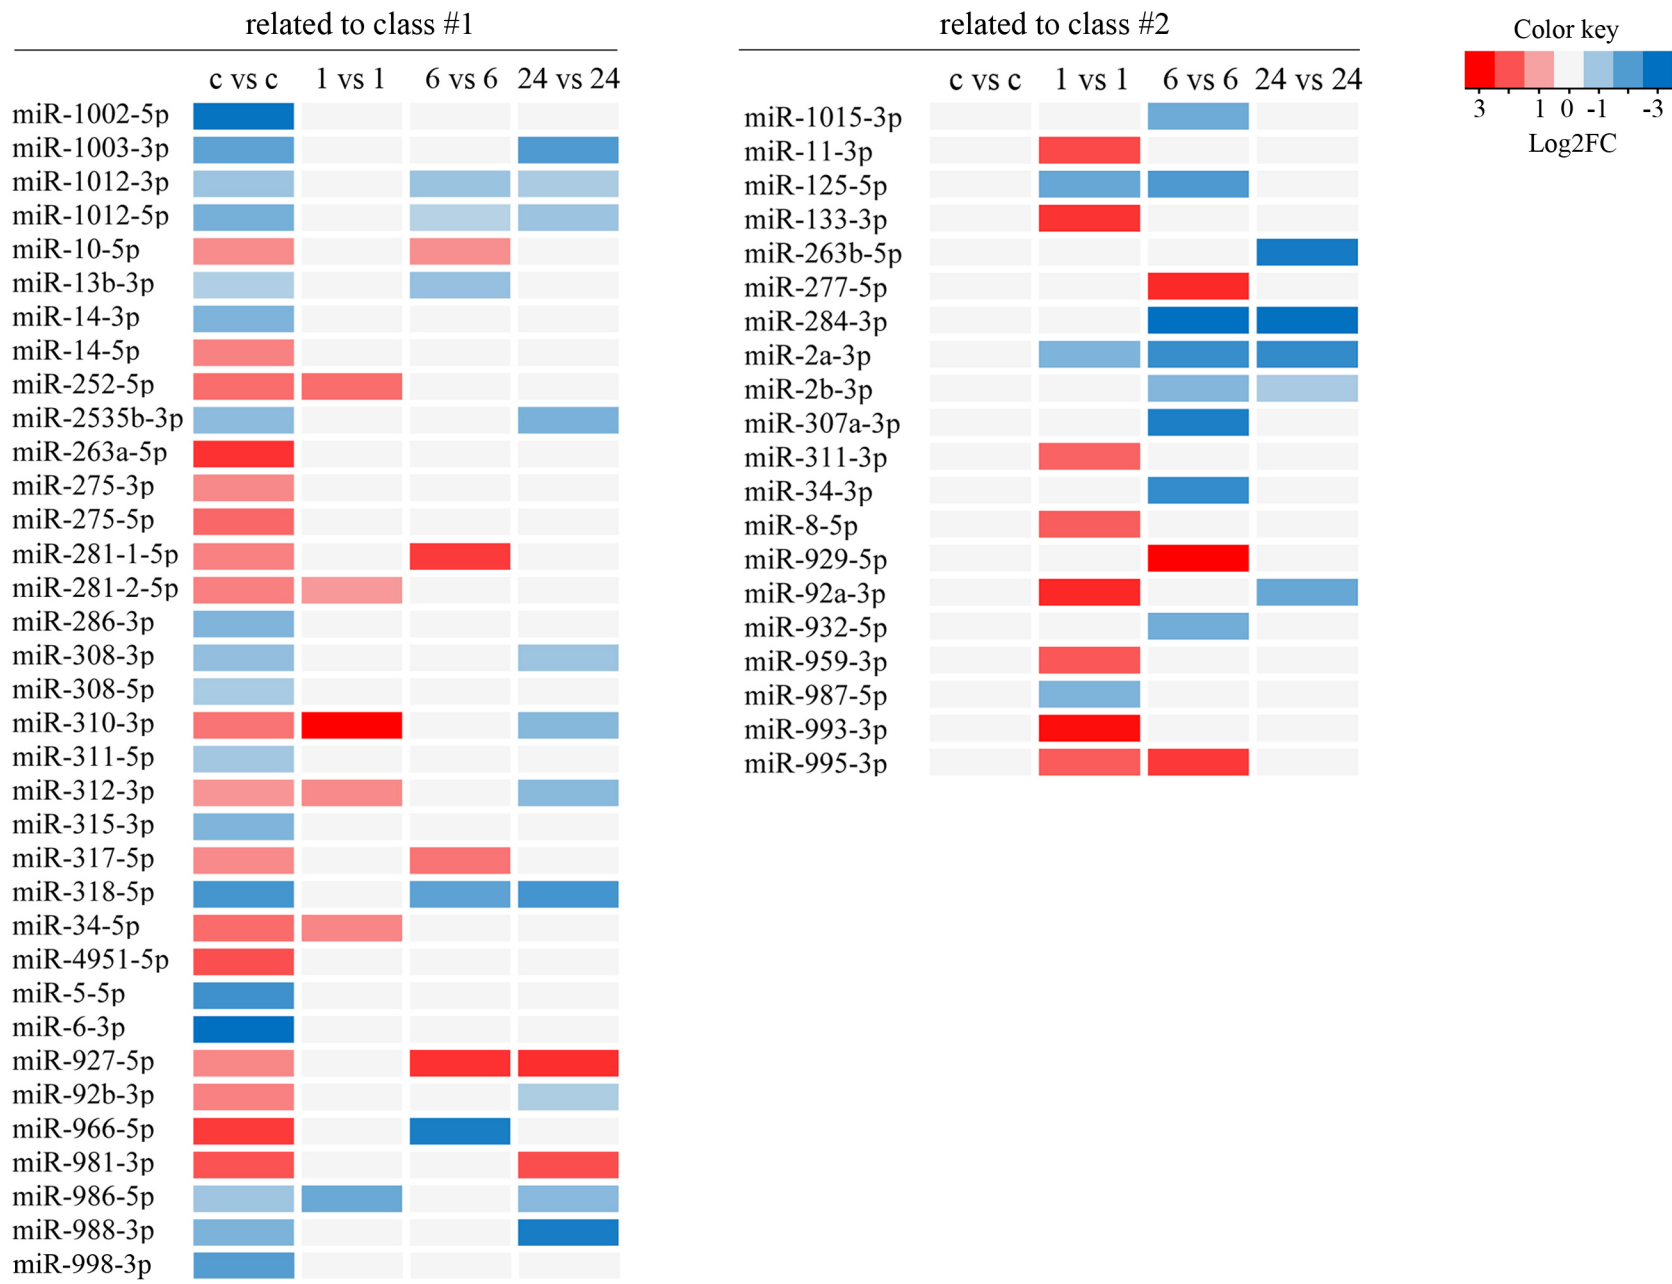

Supplement: rsob160224supp2.pdf [file rsob160224supp2.pdf]
